# Supplementary material for: Transcriptome analysis of secondary cell wall development in Medicago truncatula
Source: PubMed Central journal article supplement (PMC4700669; doi:10.1186/s12864-015-2330-6), 2016-01-05
Supplement: 12864_2015_2330_MOESM1_ESM.pdf [file 12864_2015_2330_MOESM1_ESM.pdf]

Leaf  
Petiole  
Stem  
Vegetative Bud  
Root  
Root-0d  
Mod0d  
Mod1d  
Mod4d  
Mod6d  
Flower  
Pod  
Seed0d  
Seed1d  
Seed2d  
Seed3d  
Seed4d  
Seed5d

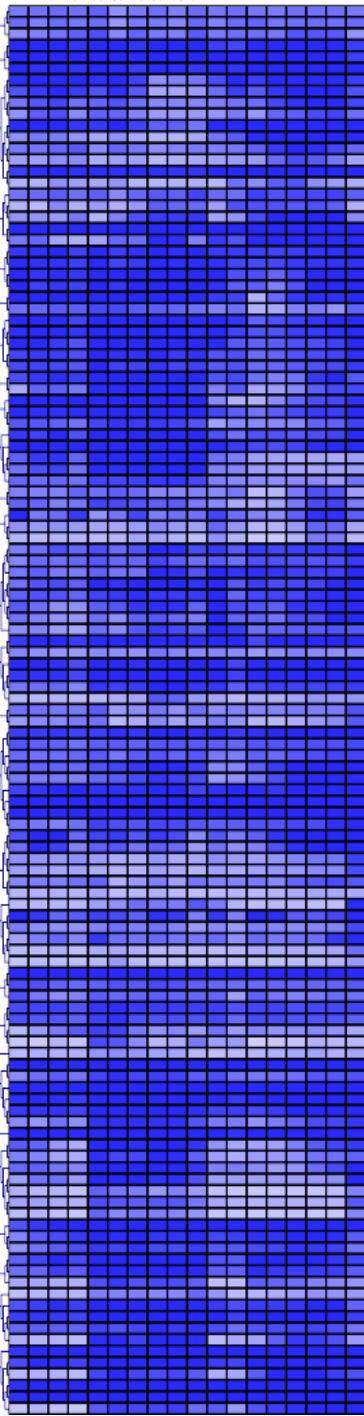

Continued to the right column

Leaf  
Petiole  
Stem  
Vegetative Bud  
Root  
Root-0d  
Mod0d  
Mod1d  
Mod4d  
Mod6d  
Flower  
Pod  
Seed0d  
Seed1d  
Seed2d  
Seed3d  
Seed4d  
Seed5d

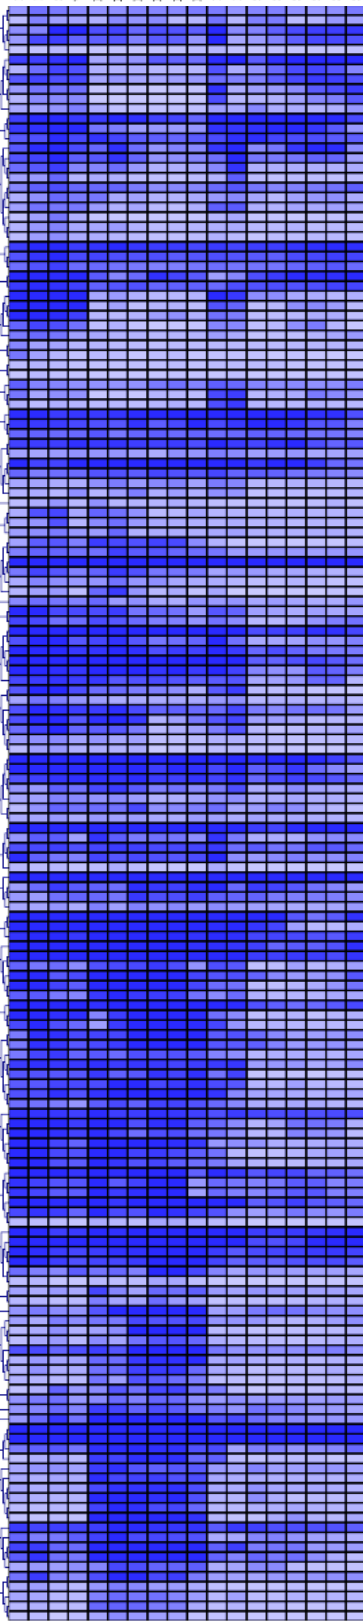

### Supplemental Figure 1. Expression pattern analysis of cluster 10 transcription factor genes.

Expression of all selected 279 transcription factors was analyzed based on expression patterns in different tissues. Red bar highlights the clade with genes highly expressed in secondary wall bearing tissues.

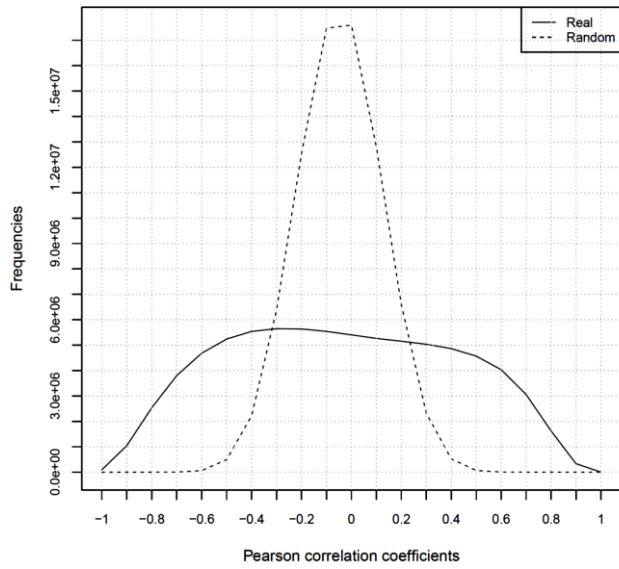

**Supplemental Figure 2.** The PCC distributions in the real and random datasets.

**Supplemental Table 1. Distribution of differentially expressed genes in the 10 clusters.**

| <b>Cluster</b> | <b>Genes</b> | <b>Gene number</b> |
|----------------|--------------|--------------------|
| Cluster 1      | 1-5068       | 5068               |
| Cluster 2      | 5069-5093    | 25                 |
| Cluster 3      | 5094-5173    | 80                 |
| Cluster 4      | 5174-5278    | 105                |
| Cluster 5      | 5279-5393    | 115                |
| Cluster 6      | 5394-5636    | 243                |
| Cluster 7      | 5637-5646    | 10                 |
| Cluster 8      | 5647-5930    | 284                |
| Cluster 9      | 5931-6160    | 230                |
| Cluster 10     | 6161-11380   | 5220               |

**Supplemental Table 2. Probe sets and corresponding names of lignin biosynthetic genes.**

| <b>Probe sets</b>   | <b>gene name</b> |
|---------------------|------------------|
| Mtr.27096.1.S1_at   | CAD1             |
| Mtr.15494.1.S1_at   | CAD2             |
| Mtr.8589.1.S1_at    | CAD3             |
| Mtr.40241.1.S1_at   | CCR1             |
| Mtr.37453.1.S1_at   | CCR2             |
| Mtr.5789.1.S1_s_at  | CCR3             |
| Mtr.40238.1.S1_at   | HCT              |
| Mtr.40166.1.S1_s_at | PAL1             |
| Mtr.50478.1.S1_at   | PAL2             |
| Mtr.51909.1.S1_at   | PAL3             |
| Mtr.40167.1.S1_s_at | PAL4             |
| Mtr.40168.1.S1_at   | PAL5             |
| Mtr.10404.1.S1_at   | PAL6             |
| Mtr.13904.1.S1_at   | 4CL1             |
| Mtr.42337.1.S1_at   | 4CL2             |
| Mtr.2048.1.S1_at    | 4CL3             |
| Mtr.25611.1.S1_at   | 4CL4             |
| Mtr.41031.1.S1_at   | 4CL5             |
| Mtr.9793.1.S1_at    | 4CL6             |
| Mtr.44778.1.S1_at   | 4CL7             |
| Mtr.45628.1.S1_s_at | 4CL8             |
| Mtr.12556.1.S1_at   | 4CL9             |
| Mtr.43335.1.S1_at   | 4CL10            |
| Mtr.10628.1.S1_at   | F5H1             |
| Mtr.42553.1.S1_s_at | F5H2             |
| Mtr.43183.1.S1_at   | C3'H             |
| Mtr.5380.1.S1_s_at  | COMT1            |
| Mtr.2631.1.S1_at    | COMT2            |
| Mtr.33866.1.S1_at   | CCOAOMT1         |
| Mtr.4850.1.S1_at    | CCOAOMT2         |
| Mtr.31539.1.S1_at   | CCOAOMT3         |
| Mtr.40942.1.S1_at   | CCOAOMT4         |

**Supplemental Table 3. Transcription factor genes upregulated during stem maturation.**

| Gene Identifier | Internode 2 | Internode 3 | Internode 5 | ternode 7 | ternode 9 |
|-----------------|-------------|-------------|-------------|-----------|-----------|
| 759.m00018      | 1           | 3.63345811  | 189.0775284 | 59.036592 | 25.513702 |
| 816.m00024      | 1           | 79.6886871  | 115.8955838 | 30.39231  | 27.084158 |
| IMGAG 67.m00243 | 1           | 6.43708517  | 112.4012858 | 303.60123 | 529.45221 |
| 1039.m00012     | 1           | 4.67954936  | 84.19203715 | 243.05015 | 655.68848 |
| 919.m00002      | 1           | 8.96058732  | 76.24061311 | 92.397773 | 93.665549 |
| 1552.m00024     | 1           | 1.16418937  | 70.37779419 | 71.671223 | 70.762852 |
| 784.m00022      | 1           | 2.22011466  | 64.96715652 | 196.95909 | 284.25787 |
| 1648.m00026     | 1           | 45.8701547  | 63.84414708 | 65.017498 | 63.139623 |
| 1400.m00006     | 1           | -           | 58.25908597 | 59.329793 | 40.701912 |
| 956.m00007      | 1           | 4.75128524  | 54.33709953 | 113.44689 | 118.14878 |
| 1001.m00016     | 1           | 5.08546495  | 51.70592224 | 70.928851 | 109.79609 |
| 1475.m00011     | 1           | 4.42438767  | 31.15647814 | 31.729083 | 45.917896 |
| 1044.m00008     | 1           | 4.43887985  | 26.08805568 | 25.23761  | 32.078271 |
| 1287.m00026     | 1           | 2.41774545  | 25.83601418 | 26.614463 | 22.26833  |
| 72.m000191      | 1           | 14.4249749  | 23.9439933  | 28.210625 | 20.798893 |
| 1183.m00022     | 1           | 10.7650479  | 20.64116774 | 139.75348 | 113.94369 |
| 1261.m00007     | 1           | 1.17969365  | 19.41797759 | 55.106401 | 104.16736 |
| 749.m00018      | 1           | 2.62577183  | 19.00500407 | 8.5372556 | 27.324216 |
| 1374.m00048     | 1           | 1.47981277  | 18.47347228 | 28.970722 | 37.76196  |
| 1047.m00031     | 1           | 1.28866374  | 16.87895388 | 19.750541 | 23.316563 |
| 119.m00199      | 1           | 1.24645339  | 16.85930007 | 11.79638  | 11.763622 |
| 812.m00002      | 1           | 6.79012493  | 14.81215425 | 16.545108 | 12.08619  |
| 1235.m00016     | 1           | 7.07459411  | 14.63032264 | 9.8345092 | 8.7846613 |
| 1230.m00008     | 1           | 7.08189971  | 14.55519932 | 37.779085 | 28.559774 |
| 1434.m00003     | 1           | 5.55394109  | 14.50908519 | 14.775739 | 9.1780328 |
| 1677.m00002     | 1           | 8.6898935   | 13.21318217 | 13.456019 | 12.234704 |
| 1194.m00013     | 1           | 1.83015422  | 12.12049395 | 18.126909 | 21.237903 |
| 773.m00019      | 1           | 0.47637024  | 12.10811336 | 9.2260828 | 10.734591 |
| 1064.m00002     | 1           | 3.16480456  | 11.04030543 | 10.146225 | 13.751037 |
| 1376.m00003     | 1           | 2.90913461  | 10.96450655 | 8.6923504 | 7.4812777 |
| 1042.m00016     | 1           | 4.39277692  | 10.34381191 | 8.972535  | 8.1205021 |
| 980.m00009      | 1           | 1.78175995  | 10.25772254 | 44.40529  | 26.014346 |
| 995.m00006      | 1           | 1.85474743  | 9.906599235 | 10.088666 | 3.104871  |
| 743.m00017      | 1           | 9.60796153  | 9.725114163 | 9.9038459 | 7.1971703 |
| 1313.m00037     | 1           | 2.51965438  | 9.305416631 | 8.1717825 | 7.0313796 |
| 1254.m00011     | 1           | 17.8317741  | 9.018490265 | 9.1842354 | 6.0754716 |
| 766.m00018      | 1           | 1.87118574  | 8.339858639 | 8.4931317 | 14.135096 |
| 1254.m00006     | 1           | 8.2212015   | 8.282707381 | 8.43493   | 6.2252957 |
| 1266.m00032     | 1           | 3.10846272  | 8.213452972 | 1.6775735 | 3.5790541 |
| 920.m00017      | 1           | 5.72124053  | 8.168561426 | 6.9112312 | 7.8245137 |
| 1411.m00015     | 1           | 0.61902354  | 8.033002419 | 8.1806359 | 15.043453 |
| 822.m00019      | 1           | 1.20737805  | 8.012818552 | 8.1600811 | 15.014617 |
| 1567.m00020     | 1           | -           | 7.738856222 | 7.8810838 | 4.0400358 |
| 1224.m00021     | 1           | 0.80738305  | 7.585769784 | 5.4107386 | 2.7175285 |
| 1347.m00026     | 1           | 2.16444069  | 7.536807194 | 4.639206  | 2.3443542 |
| 1425.m00008     | 1           | 2.69413233  | 7.493117076 | 7.6308284 | 14.026759 |
| 736.m00014      | 1           | 7.35200386  | 7.441085278 | 7.7857829 | 5.7210675 |
| 739.m00012      | 1           | 0.37525541  | 7.380855958 | 8.8694339 | 14.817364 |
| 1015.m00015     | 1           | 1.8988633   | 7.170599088 | 9.6827562 | 7.7827185 |
| 905.m00015      | 1           | 2.14178221  | 6.448987615 | 11.285783 | 12.973148 |
| 930.m00011      | 1           | 2.6043995   | 6.322752745 | 8.7282489 | 9.8942844 |
| 767.m00007      | 1           | 0.95645439  | 6.212044426 | 0.6483232 | 8.9671318 |
| 135.m00197      | 1           | 2.60315015  | 5.985657401 | 6.7237136 | 8.4622988 |
| 1276.m00011     | 1           | 2.36717091  | 5.667142001 | 5.7712948 | 3.0678256 |
| 747.m00011      | 1           | 0.22711225  | 5.385970359 | 6.4260414 | 5.8869712 |
| 1140.m00014     | 1           | 1.64603576  | 5.306243344 | 6.6518426 | 6.3839346 |
| 988.m00017      | 1           | 1.28453695  | 4.783488647 | 5.9722148 | 6.0681684 |
| 1147.m00014     | 1           | 2.07984479  | 4.55827461  | 6.7837162 | 6.989861  |
| 1316.m00009     | 1           | 1.3256682   | 4.519416844 | 39.438006 | 46.142964 |
| 918.m00003      | 1           | 1.14057427  | 4.366544499 | 6.7593575 | 8.2168112 |
| 1084.m00021     | 1           | 2.11100153  | 4.068318923 | 5.7671053 | 4.2979086 |
| 1705.m00010     | 1           | 0.95471663  | 4.000708833 | 4.0742353 | 8.3415816 |
| 972.m00008      | 1           | 2.84012058  | 3.038069302 | 7.5051991 | 8.6395952 |
| 1047.m00030     | 1           | 0.95835404  | 2.612938341 | 14.248976 | 19.802758 |
